# Supplementary material
Source: ML conference proceedings conference paper supplement (https://openaccess.thecvf.com/content/CVPR_2019/html/Wertheimer_Few-Shot_Learning_With_CVPR_2019_paper.html)
Supplement: Supplementary file 1 [file Wertheimer_Few-Shot_Learning_With_CVPR_2019_supplemental.pdf]

# Few-Shot Learning with Localization in Realistic Settings (Supplementary Materials)

## 1. Additional Results

### 1.1. Ablation Study

Top-1 and top-5 mean and per-class accuracies are given below. Three-digit model names indicate the presence or absence of batch folding, localization, and covariance pooling, in that order. For example, ‘101’ indicates a model with batch folding and covariance pooling, but no localization. Because two versions of localization exist, we use ‘0’ to indicate no localization, ‘1’ for few-shot localization, and ‘2’ for unsupervised localization. A ‘\*’ indicates a model presented in the main paper.

| Model | Top-1 Accuracy |             | Top-5 Accuracy |             |
|-------|----------------|-------------|----------------|-------------|
|       | Mean           | Per-Class   | Mean           | Per-Class   |
| 000*  | 16.07 ± .19    | 17.55 ± .19 | 42.10 ± .21    | 41.98 ± .18 |
| 100*  | 20.04 ± .04    | 20.81 ± .08 | 47.86 ± .31    | 46.57 ± .23 |
| 010   | 21.55 ± .09    | 22.37 ± .08 | 50.20 ± .08    | 48.70 ± .08 |
| 001   | 24.31 ± .48    | 24.64 ± .39 | 53.29 ± .76    | 51.09 ± .63 |
| 020   | 24.32 ± .15    | 24.68 ± .81 | 53.16 ± .89    | 51.44 ± .94 |
| 021   | 25.60 ± 1.02   | 25.51 ± .90 | 54.66 ± 1.07   | 52.04 ± .91 |
| 110*  | 26.25 ± .05    | 26.29 ± .04 | 55.43 ± .09    | 53.01 ± .08 |
| 011   | 27.46 ± .15    | 26.39 ± .14 | 56.37 ± .17    | 52.37 ± .17 |
| 120*  | 28.75 ± .13    | 28.39 ± .15 | 57.90 ± .24    | 55.27 ± .37 |
| 101   | 31.06 ± .61    | 29.07 ± .53 | 60.41 ± .67    | 55.50 ± .62 |
| 121*  | 32.74 ± .13    | 30.52 ± .13 | 61.32 ± .14    | 56.62 ± .16 |
| 111*  | 35.52 ± .05    | 31.69 ± .06 | 63.76 ± .09    | 57.33 ± .10 |

Between any two models with different numbers of features, the one with more always outperforms the one with less, regardless of combination. Thus batch folding, localization, and covariance pooling consistently and independently improve performance on meta-iNat.

### 1.2. Learning Without Forgetting

We evaluate the ability of our prototype-styled classifiers to adapt to new concepts without forgetting old ones. We combine the evaluation and representation sets of meta-iNat into a single, larger dataset and provide accuracy numbers for prototype-styled classifiers. Softmax classifiers are ignored, as they cannot handle old and new concepts simultaneously without completely replacing the topmost fully-connected layer. While accuracy decreases overall (we are now distinguishing between 1135 categories rather than 227), batch folding, few-shot localization, and covariance pooling still lead to significant improvements. For logistical reasons, we run only one trial in all settings, though we still evaluate four independently trained models for each.

| Model                         | Top-1 Accuracy |             | Top-5 Accuracy |             |
|-------------------------------|----------------|-------------|----------------|-------------|
|                               | Mean           | Per-Class   | Mean           | Per-Class   |
| Baseline                      | 6.64 ± .06     | 7.37 ± .08  | 21.08 ± .13    | 21.08 ± .19 |
| Batch Folding                 | 8.87 ± .13     | 9.35 ± .14  | 25.92 ± .20    | 25.13 ± .16 |
| BF + few-shot localization    | 13.22 ± .04    | 13.11 ± .07 | 33.54 ± .12    | 31.60 ± .12 |
| BF + fsL + covariance pooling | 20.69 ± .16    | 17.44 ± .13 | 43.70 ± .23    | 37.17 ± .33 |

## 2. Network Architectures

Our learner architectures mimic the original prototypical networks. Networks contain four 64-channel  $3 \times 3$  convolutional layers, with Batchnorm, ReLU, and  $2 \times 2$  max-pooling in between. This is followed by Batchnorm and  $10 \times 10$  global average-pooling, for a 64-dimensional feature vector. Unlike prototypical networks, which flatten the feature map to a

6400-dimensional vector, we use average pooling to eliminate spatial priors on uncentered, uncropped images. Softmax classifier models use a fully-connected layer on top of the feature vector; prototype classifiers use the feature vector directly. Localization and covariance pooling models replace average-pooling layers with the appropriate algorithm(s).

Models based on ResNet50 use the first two stages of a ResNet50 model, pretrained on ImageNet, to produce  $28 \times 28$  feature maps with 512 channels. Learned layers consist of  $2 \times 2$  max-pooling, followed by  $3 \times 3$  convolution with 128 channels, Batchnorm, ReLU, a second  $3 \times 3$  convolution with 64 channels, and Batchnorm. The resulting  $14 \times 14$  feature maps are localized, average pooled, or covariance pooled as appropriate. As in the original setting, softmax classifiers use an additional fully-connected layer, while prototype architectures use the pooled embeddings directly.

### 3. Training and Implementation Details

#### 3.1. Training

We train meta-iNat models via SGD with Adam, using an initial learning rate of  $10^{-3}$  and dividing by two every epoch. Each epoch consists of 10 passes over the representation set, with five epochs in total. For mini-ImageNet, we lengthen each epoch to 28 passes, to account for the smaller representation set.

In both settings we unit-normalize input color channels. We use random horizontal flipping but no other data augmentation. Because bounding boxes are downsized to very small resolutions (e.g.  $10 \times 10$ ), we use  $4 \times 4$  average-pooling before downsampling, as a fast approximation for anti-aliasing.

#### 3.2. Batch Sampling

While mini-ImageNet uses random batch sampling with replacement during training and testing, meta-iNat uses a different sampling procedure for each. During each training iteration, classes are sampled without replacement: so long as classes have sufficient remaining images to create a batch, they are sampled proportionately to the number of available images they contain. This ensures that differently-sized classes occur at constant, representative rates throughout the entire sampling process. Images are then selected from the sampled classes, and those images are subsequently unavailable for further training until the next pass over the dataset.

During testing, we wish to evaluate classification accuracy for relatively large numbers of classes and images. For sufficiently high values, it becomes impossible to process the sampled datasets as single batches in computer memory. Category sizes also vary so widely that it no longer makes sense to use constant sample sizes. Rather than attempt to evaluate a given network on a large number of large and complicated datasets, we instead impose a single reference/query split over the evaluation set.

Evaluation consists of one pass over the reference images followed by one pass over the query images. During the reference pass, each category is split into manageable batches, and the class centroid is computed from a running total of the embedding vectors. The query pass is divided the same way, and the pre-computed centroids are used to make class predictions. When localization is used, we run 10 trials where different 10% subsets of the reference images are randomly selected to receive bounding box annotations.

The above applies to prototype-styled classifiers, which require representation and query sets for a limited selection of classes in every batch. For straightforward softmax classifiers, we instead use random sampling without replacement, and a batch size of 128. Annealing schedule is as above.

#### 4. Additional Few-Shot Localization Examples

When individual bounding boxes in the annotated reference image are small, localization tends to work well, given the model's lack of power (a four-layer network with  $10 \times 10$  outputs and no localization supervision). The leftmost image provides the ground truth bounding box(es).

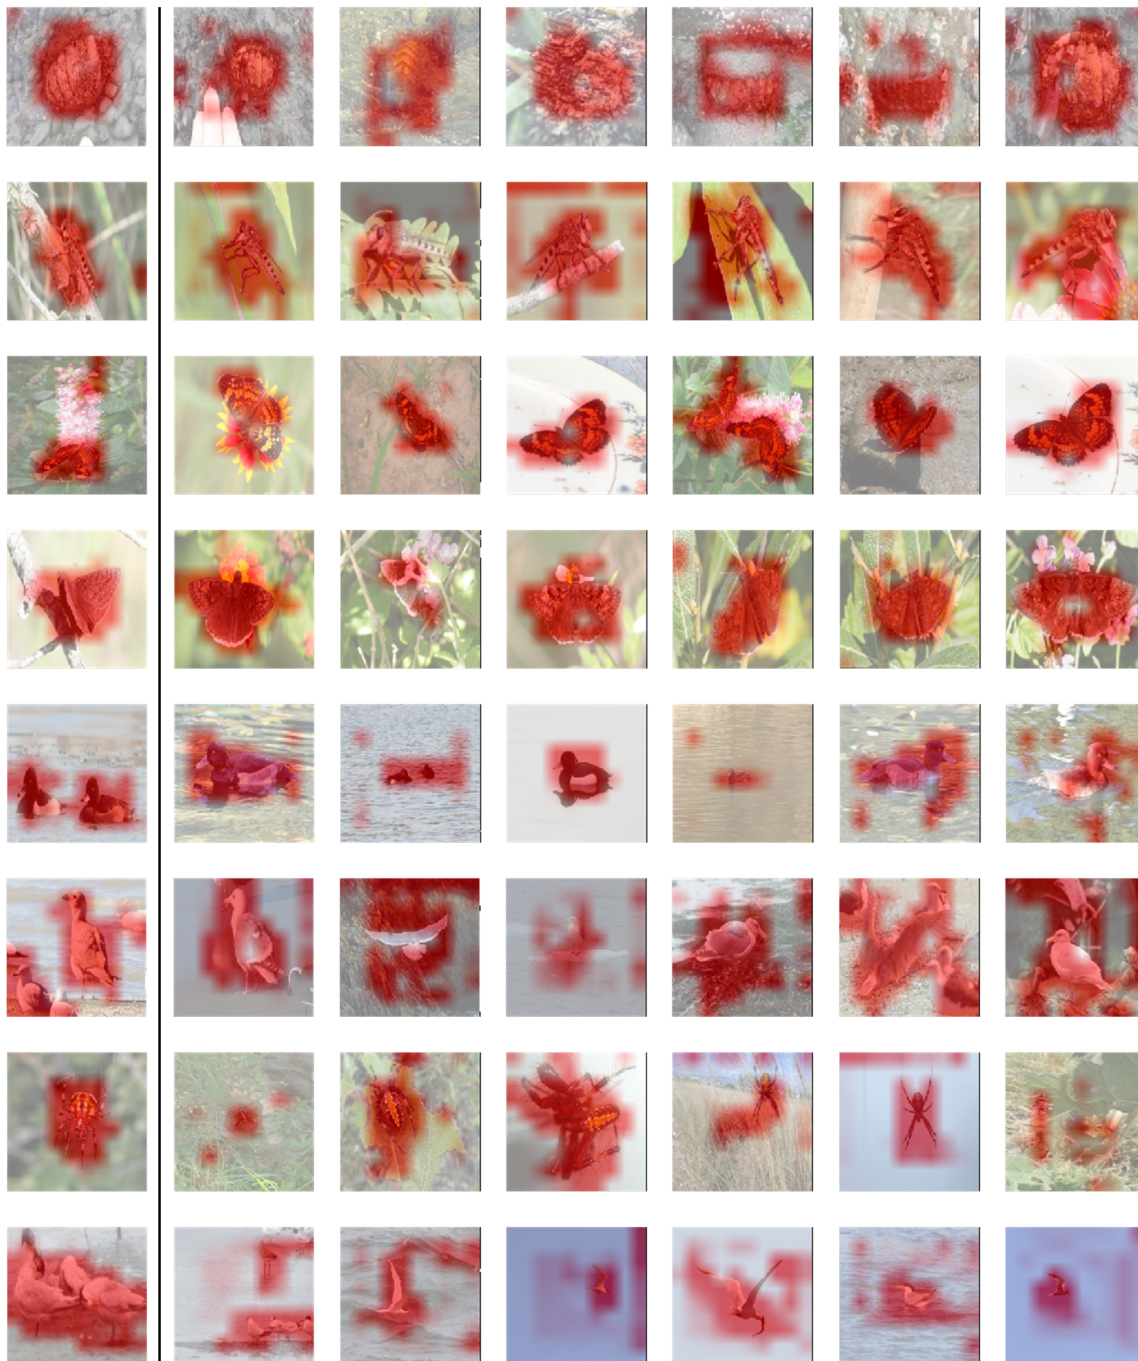

### 4.1. Failure cases

When bounding boxes in the annotated reference image are too large or too small, localizer performance breaks down. In the former case, too much of the background is included in the bounding box, and the localizer becomes over-inclusive.

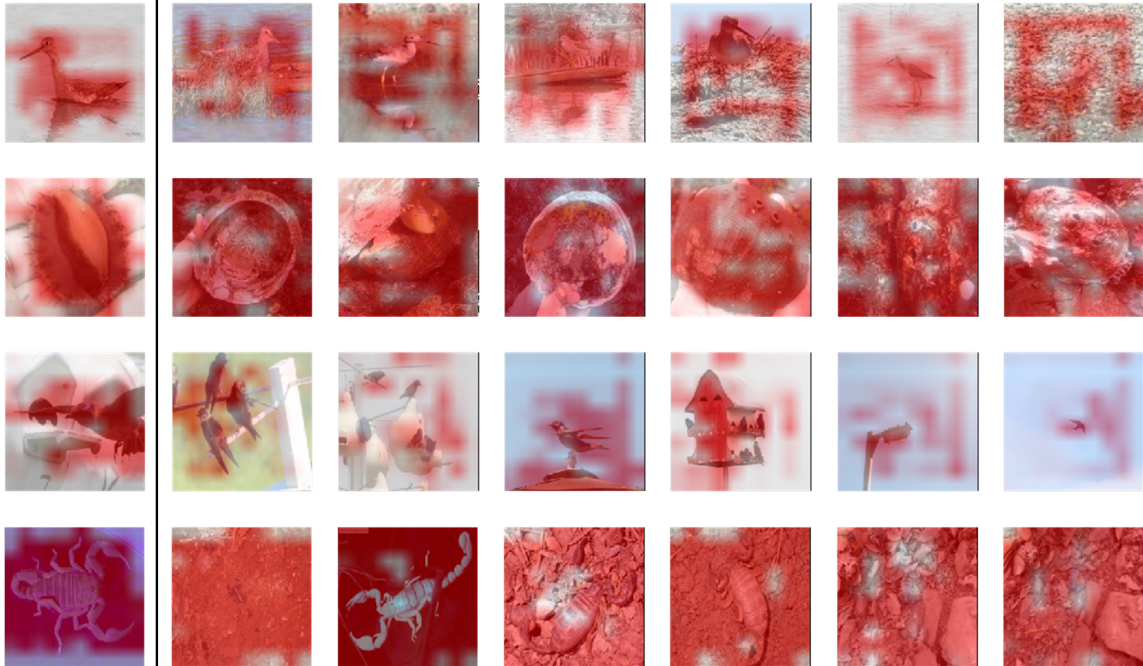

When bounding boxes are too small, the localizer focuses on the wrong things, selects small parts of the object in question, or in some cases fails to detect a region of interest at all.

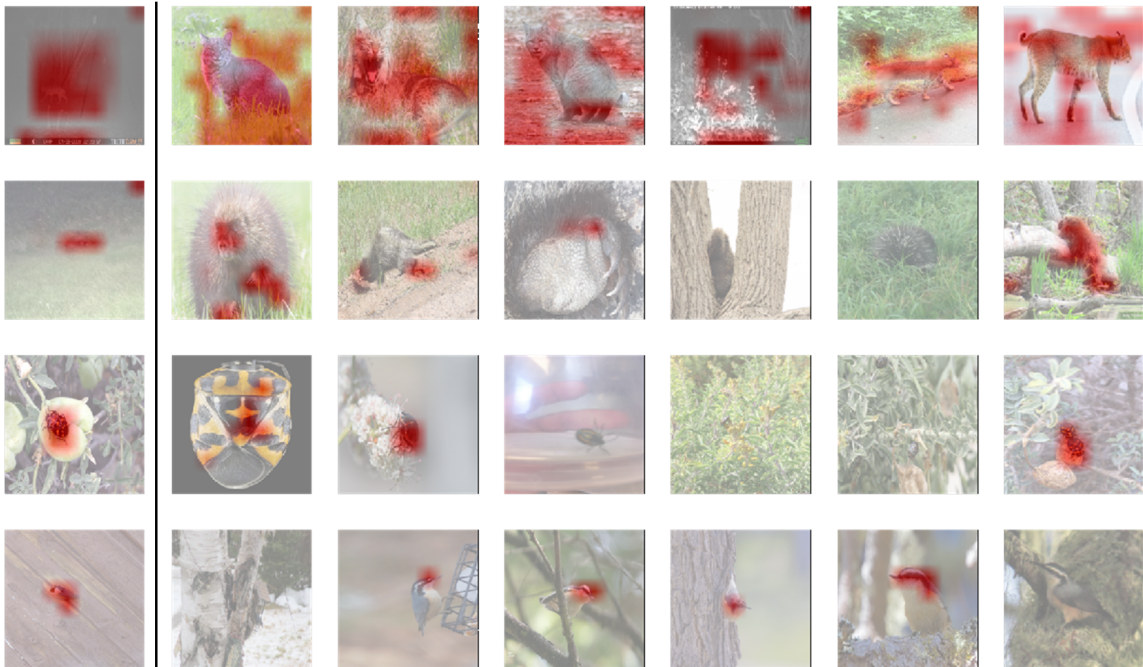

## 4.2. Additional annotations

Localizer performance generally improves as more annotations are made available.

**One annotation per row:** The localizer often selects only parts of the relevant object, or includes significant portions of the background.

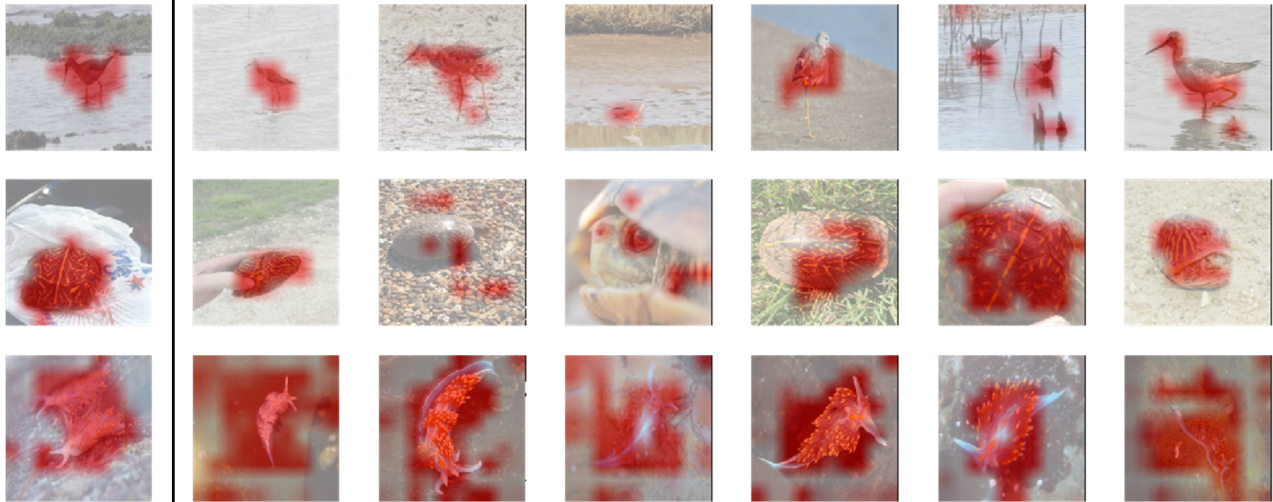

**Two annotations per row:** The localizer has eliminated much of the irrelevant background areas from its predictions, increasing precision (see bottom row in particular), as well as including more of the relevant object.

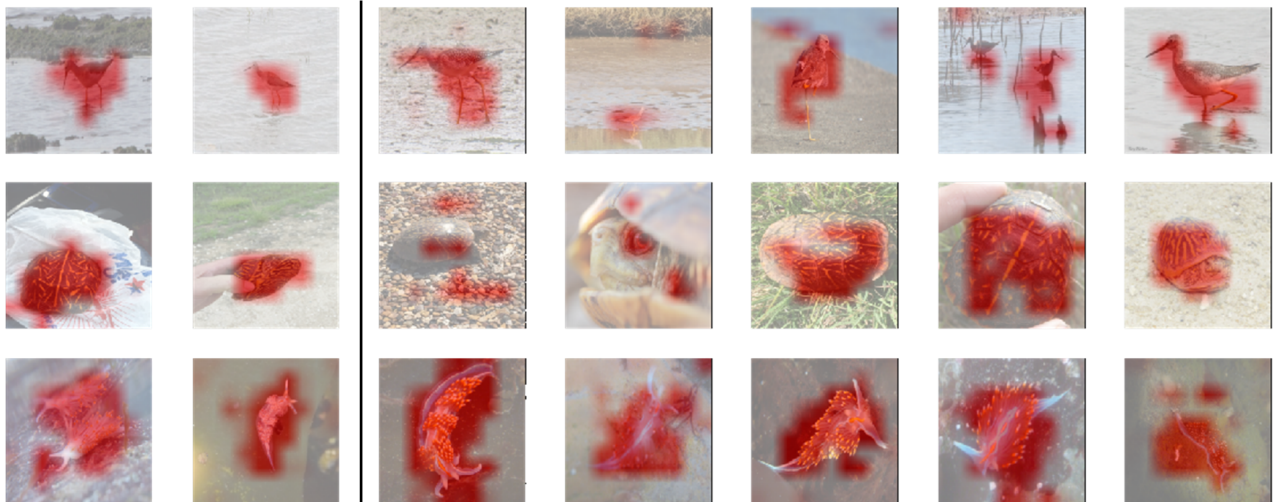

**Three annotations per row:** The localizer includes larger portions for photos where it originally selected only a small subregion, improving recall (see middle row in particular).

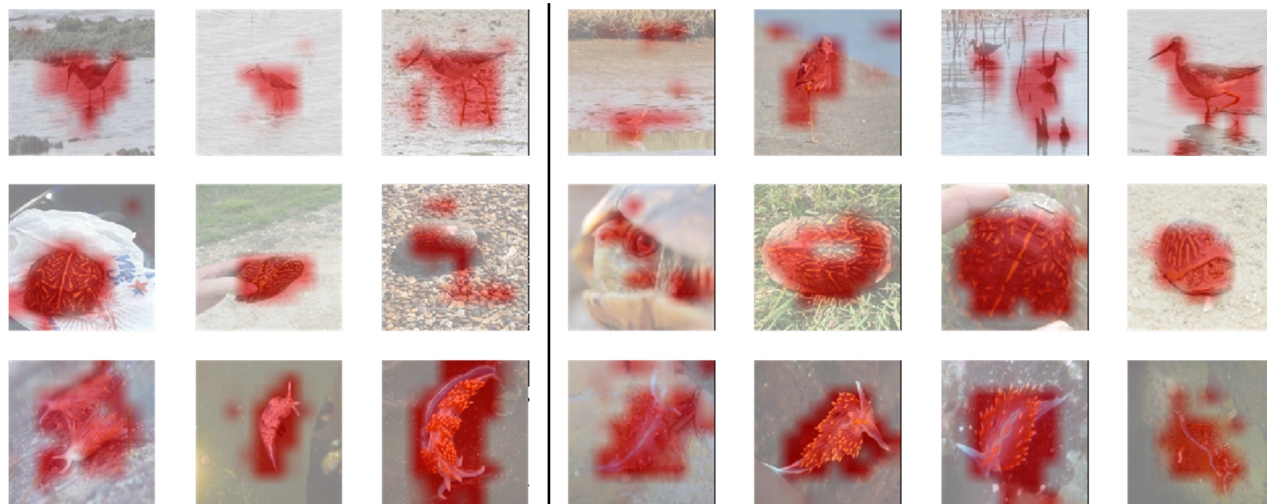

## 5. Meta-iNat Category Splits

The code for meta-iNat is available on GitHub, but we list the category assignments here for the sake of completeness.

### Evaluation Categories

|                                           |                                        |                                              |
|-------------------------------------------|----------------------------------------|----------------------------------------------|
| Arachnida/Nephila clavipes                | Aves/Cygnus columbianus                | Aves/Sialia currucoides                      |
| Aves/Cyanocitta cristata                  | Animalia/Patriella regularis           | Aves/Sphyrapicus varius                      |
| Insecta/Phoebis sennae                    | Insecta/Hypsopygia olinalis            | Aves/Zosterops lateralis                     |
| Aves/Selasphorus sasin                    | Insecta/Ischnura elegans               | Insecta/Lasiommata megera                    |
| Aves/Anas platyrhynchos domesticus        | Aves/Todiramphus sanctus vagans        | Insecta/Anthanassa tulcis                    |
| Mollusca/Hermisenda opalescens            | Aves/Melanerpes carolinus              | Insecta/Stagmomantis carolina                |
| Insecta/Murgantia histrionica             | Insecta/Atalopedes campestris          | Insecta/Tramea onusta                        |
| Aves/Clangula hyemalis                    | Aves/Aphelocoma californica            | Insecta/Sceliphron caementarium              |
| Insecta/Speranza pustularia               | Aves/Sitta canadensis                  | Aves/Corvus monedula                         |
| Aves/Buteo regalis                        | Mollusca/Ariolimax columbianus         | Insecta/Papilio rutulus                      |
| Aves/Gerygone igata                       | Insecta/Pantala flavescens             | Insecta/Argia apicalis                       |
| Insecta/Aeshna umbrosa                    | Insecta/Polistes exclamans             | Aves/Polioptila caerulea                     |
| Insecta/Nomophila nearctica               | Aves/Geranoaetus albicaudatus          | Amphibia/Anaxyrus fowleri                    |
| Reptilia/Sauromalus ater                  | Arachnida/Phidippus johnsoni           | Aves/Petroica australis longipes             |
| Aves/Athene cucularia                     | Aves/Numenius phaeopus                 | Reptilia/Crotalus oreganus oreganus          |
| Aves/Vireo olivaceus                      | Aves/Rynchops niger                    | Reptilia/Pituophis catenifer annectens       |
| Aves/Chloroceryle americana               | Aves/Tadorna variegata                 | Mammalia/Sylvilagus audubonii                |
| Insecta/Scopula limboundata               | Aves/Tigrisoma mexicanum               | Aves/Baeolophus bicolor                      |
| Insecta/Cleptis peritana                  | Aves/Gallus gallus domesticus          | Aves/Oreothlypis peregrina                   |
| Insecta/Xylocopa virginica                | Aves/Phalaropus lobatus                | Mammalia/Orcinus orca                        |
| Insecta/Leucorrhinia intacta              | Insecta/Sympetrum pallipes             | Reptilia/Nerodia erythrogaster<br>transversa |
| Reptilia/Ctenosaura similis               | Reptilia/Aspidoscelis gularis          | Aves/Chen caerulescens                       |
| Insecta/Speyeria cybele                   | Aves/Botaurus lentiginosus             | Mammalia/Tamias striatus                     |
| Reptilia/Uta stansburiana elegans         | Aves/Thalasseus elegans                | Aves/Progne subis                            |
| Mammalia/Odocoileus hemionus californicus | Animalia/Strongylocentrotus purpuratus | Aves/Charadrius nivosus                      |
| Insecta/Polistes carolina                 | Aves/Contopus sordidulus               | Mammalia/Lynx rufus                          |
| Reptilia/Diadophis punctatus              | Amphibia/Lithobates berlandieri        | Aves/Amazilia violiceps                      |
| Insecta/Maniola jurtina                   | Amphibia/Eurycea bislineata            | Aves/Corvus corax                            |
| Aves/Melanerpes chrysogenys               | Aves/Podiceps auritus                  | Aves/Pica hudsonia                           |
| Aves/Egretta rufescens                    | Insecta/Tramea lacerata                | Aves/Platalea ajaja                          |
| Insecta/Callophrys gryneus                | Reptilia/Terrapene ornata              | Aves/Passerina cyanea                        |
| Mollusca/Haliotis rufescens               | Aves/Spinus pinus                      | Insecta/Argia immunda                        |
| Reptilia/Coluber constrictor              | Aves/Spizelloides arborea              | Aves/Histrionicus histrionicus               |
| Insecta/Cycloneda sanguinea               | Insecta/Idia americalis                | Aves/Melospiza crissalis                     |
| Insecta/Anax junius                       | Insecta/Plutella xylostella            | Reptilia/Hierophis viridiflavus              |
| Mollusca/Acanthodoris lutea               | Mammalia/Sylvilagus floridanus         | Aves/Poecile carolinensis                    |
| Aves/Momotus mexicanus                    | Insecta/Papilio multicaudata           | Mollusca/Octopus rubescens                   |
| Reptilia/Pituophis catenifer sayi         | Insecta/Asterocampa clyton             | Aves/Cassidix melanicterus                   |
| Amphibia/Plethodon albagula               | Reptilia/Phrynosoma hernandesi         | Aves/Sterna forsteri                         |
| Reptilia/Thamnophis proximus              | Insecta/Macromia illinoensis           | Aves/Auriparus flaviceps                     |
| Mammalia/Erethizon dorsatum               | Amphibia/Lithobates palustris          | Aves/Phalacrocorax varius varius             |
| Arachnida/Phidippus audax                 | Insecta/Chauliognathus pennsylvanicus  | Insecta/Toxomerus marginatus                 |
| Reptilia/Thamnophis proximus orarius      | Mollusca/Mopalia muscosa               | Insecta/Promachus hinei                      |
| Aves/Falco mexicanus                      | Mollusca/Lottia gigantea               | Aves/Toxostoma redivivum                     |
| Aves/Pipilo erythrophthalmus              | Insecta/Ceratonia undulosa             | Reptilia/Heterodon platirhinos               |
| Insecta/Eacles imperialis                 | Arachnida/Salticus scenicus            | Aves/Larus glaucescens                       |
|                                           |                                        | Insecta/Satyrium calanus                     |

Aves/Alopochen aegyptiaca  
Reptilia/Plestiodon fasciatus  
Insecta/Papilio eurymedon  
Insecta/Lygaeus kalmii  
Aves/Calidris melanotos  
Aves/Molothrus ater  
Aves/Pelecanus occidentalis californicus  
Insecta/Dryas iulia  
Reptilia/Pantherophis obsoletus lindheimeri  
Insecta/Dryocampa rubicunda  
Animalia/Armadillidium vulgare  
Mammalia/Lontra canadensis  
Reptilia/Agkistrodon piscivorus leucostoma  
Insecta/Epithea princeps  
Aves/Lanius collurio  
Aves/Campylorhynchus brunneicapillus  
Insecta/Polygona interrogationis  
Insecta/Chioidea albofasciatus  
Reptilia/Crotalus horridus  
Aves/Vireo griseus  
Insecta/Danaus gilippus  
Insecta/Ladona deplanata  
Aves/Junco phaeonotus  
Aves/Chroicocephalus ridibundus  
Insecta/Archilestes grandis  
Arachnida/Uroctonus mordax  
Actinopterygii/Lepomis macrochirus  
Insecta/Libellula forensis  
Aves/Calidris alba  
Aves/Ictinia mississippiensis  
Mammalia/Ursus americanus  
Insecta/Glaucopsyche lygdamus  
Aves/Lonchura punctulata  
Arachnida/Neoscona oaxacensis  
Aves/Loxia curvirostra  
Insecta/Polyphylla decemlineata  
Aves/Aegithalos caudatus  
Reptilia/Crotalus molossus  
Amphibia/Anaxyrus woodhousii  
Aves/Vireo gilvus  
Aves/Sialia sialis  
Aves/Amphispiza bilineata  
Aves/Egretta novaehollandiae  
Insecta/Anicla infecta  
Aves/Tringa melanoleuca  
Amphibia/Lithobates sylvaticus  
Aves/Himantopus mexicanus  
Insecta/Chlosyne nycteis  
Aves/Anser anser domesticus

Aves/Larus occidentalis  
Aves/Prunella modularis  
Reptilia/Phrynosoma blainvillii  
Aves/Aramus guarauna  
Insecta/Hypoprepia fucosa  
Insecta/Erynnis tristis  
Amphibia/Taricha rivularis  
Aves/Aythya fuligula  
Animalia/Pollicipes polymerus  
Insecta/Cercyonis pegala  
Aves/Pica pica  
Aves/Larus heermanni  
Aves/Phainopepla nitens  
Animalia/Pachygrapsus crassipes  
Mammalia/Castor canadensis  
Amphibia/Salamandra salamandra  
Insecta/Anartia jatrophae  
Insecta/Aedes albopictus  
Mammalia/Bison bison  
Reptilia/Lampropeltis californiae  
Insecta/Gomphus militaris  
Aves/Chlidonias niger  
Animalia/Physalia physalis  
Aves/Eolophus roseicapilla  
Aves/Phalacrocorax penicillatus  
Reptilia/Chrysemys picta marginata  
Insecta/Epargyreus clarus  
Insecta/Bombus impatiens  
Aves/Protonotaria citrea  
Insecta/Pyrgus communis  
Insecta/Bombus ternarius  
Insecta/Anax longipes  
Aves/Cyanistes caeruleus  
Insecta/Polites peckius  
Insecta/Orthemis ferruginea  
Insecta/Actias luna  
Actinopterygii/Salvelinus fontinalis  
Reptilia/Thamnophis elegans  
Insecta/Colias philodice



## Representation Categories

Reptilia/Sceloporus poinsettii  
Aves/Chordeiles minor  
Aves/Anas cyanoptera  
Reptilia/Opheodrys aestivus  
Aves/Pelecanus erythrorhynchos  
Aves/Tyrannus tyrannus  
Reptilia/Ctenosaura pectinata  
Insecta/Lophocampa maculata  
Mollusca/Aeolidia papillosa  
Mammalia/Mus musculus  
Arachnida/Centruroides vittatus  
Reptilia/Nerodia sipedon  
Amphibia/Batrachoseps attenuatus  
Insecta/Celithemis eponina  
Mammalia/Tursiops truncatus  
Insecta/Heraclides crespontes  
Aves/Phasianus colchicus  
Insecta/Asterocampa celtis  
Aves/Setophaga discolor  
Aves/Motacilla cinerea  
Reptilia/Sceloporus orcutti  
Aves/Tachybaptus ruficollis  
Aves/Streptopelia decaocto  
Insecta/Chinavia hilaris  
Aves/Anser cygnoides domesticus  
Aves/Cistothorus palustris  
Reptilia/Lampropeltis holbrooki  
Aves/Garrulus glandarius  
Reptilia/Actinemys marmorata  
Insecta/Forficula auricularia  
Mammalia/Sciurus griseus  
Aves/Colaptes auratus  
Aves/Melanerpes aurifrons  
Aves/Carduelis carduelis  
Aves/Gymnogyps californianus  
Aves/Bucephala clangula  
Aves/Passerina amoena  
Insecta/Papilio polyxenes asterius  
Aves/Ammodramus savannarum  
Aves/Butorides striata  
Amphibia/Pseudacris cadaverina  
Insecta/Erpetogomphus designatus  
Aves/Vanellus vanellus  
Insecta/Romalea microptera  
Aves/Baeolophus inornatus  
Aves/Campephilus guatemalensis  
Animalia/Patiria miniata  
Reptilia/Crotalus oreganus helleri  
Insecta/Ischnura cervula  
Insecta/Aglais milberti  
Aves/Aix sponsa  
Reptilia/Gopherus agassizii  
Insecta/Hemaris thysbe  
Mammalia/Thomomys bottae  
Aves/Zonotrichia atricapilla  
Insecta/Spoladea recurvalis  
Mammalia/Nasua narica  
Amphibia/Hyla cinerea  
Aves/Ardea cinerea  
Aves/Gallinago delicata  
Insecta/Strymon melinus  
Aves/Elanus leucurus  
Aves/Euphagus carolinus  
Insecta/Pyrgus oileus  
Mammalia/Antilocapra americana  
Aves/Turdus pilaris  
Insecta/Cupido comyntas  
Insecta/Euphyes vestris  
Insecta/Hymenia perspectalis  
Animalia/Anthopleura sola  
Insecta/Mantis religiosa  
Insecta/Automeris io  
Insecta/Libellula cyanea  
Insecta/Megacyllene robiniae  
Mammalia/Cervus elaphus  
Reptilia/Coluber constrictor flaviventris  
Insecta/Pararge aegeria  
Aves/Larus hyperboreus  
Insecta/Argia translata  
Aves/Archilochus alexandri  
Arachnida/Aphonopelma hentzi  
Insecta/Spilosoma virginica  
Aves/Microcarbo melanoleucos bre-  
virostris  
Aves/Porzana carolina  
Insecta/Necrophila americana  
Aves/Sitta carolinensis  
Mammalia/Tamiasciurus hudsonicus  
Aves/Picoides scalaris  
Aves/Icterus gularis  
Insecta/Calycopsis isobea  
Aves/Setophaga fusca  
Mollusca/Limax maximus  
Aves/Cardinalis sinuatus  
Aves/Galerida cristata  
Reptilia/Hemidactylus frenatus  
Insecta/Cotinis mutabilis  
Aves/Haematopus bachmani  
Insecta/Costaconvexa centrostrigaria  
Insecta/Polistes apachus  
Aves/Piaya cayana  
Insecta/Dythemis fugax  
Insecta/Zelus longipes  
Insecta/Ascalapha odorata  
Aves/Icterus cucullatus  
Insecta/Heliopetes ericetorum  
Aves/Eremophila alpestris  
Insecta/Darapsa myron  
Insecta/Nymphalis californica  
Reptilia/Rhinocheilus lecontei  
Aves/Branta hutchinsii  
Aves/Columba palumbus  
Aves/Coccyzus americanus  
Aves/Picoides villosus  
Aves/Rallus limicola  
Mollusca/Corbicula fluminea  
Aves/Stelgidopteryx serripennis  
Aves/Geopelia striata  
Aves/Thryothorus ludovicianus  
Mammalia/Sciurus vulgaris  
Aves/Limosa fedoa  
Reptilia/Basiliscus vittatus  
Aves/Porphyrio melanotus melanotus  
Insecta/Sympetrum vicinum  
Insecta/Argia moesta  
Reptilia/Dipsosaurus dorsalis  
Amphibia/Ambystoma opacum  
Insecta/Malacosoma disstria  
Aves/Acanthis flammea  
Insecta/Heraclides rumiko  
Aves/Junco hyemalis oreganus  
Arachnida/Araneus diadematus  
Aves/Catharus guttatus  
Aves/Tyrannus melancholicus  
Amphibia/Anaxyrus punctatus  
Amphibia/Pseudacris hypochondri-  
aca  
Insecta/Battus philenor  
Insecta/Sphecius speciosus  
Insecta/Micrathyria hagenii  
Insecta/Malacosoma americanum  
Insecta/Hetaerina titia  
Aves/Passerina versicolor  
Aves/Anas acuta  
Reptilia/Aspidoscelis tigris stejnegeri  
Aves/Ortalis vetula  
Reptilia/Iguana iguana  
Mammalia/Marmota flaviventris  
Aves/Callipepla californica  
Aves/Cyanocorax yncas  
Mammalia/Oryctolagus cuniculus  
Reptilia/Chrysemys picta picta

|                                   |      |                                     |                                     |
|-----------------------------------|------|-------------------------------------|-------------------------------------|
| Aves/Larus michahellis            |      | Aves/Nestor meridionalis septentri- | Amphibia/Gastrophryne carolinensis  |
| Aves/Aythya collaris              |      | onalis                              | Aves/Parkesia noveboracensis        |
| Reptilia/Agkistrodon contortrix   |      | Reptilia/Storeria dekayi            | Insecta/Limenitis arthemis          |
| Aves/Poecile rufescens            |      | Aves/Thraupis abbas                 | Mammalia/Procyon lotor              |
| Aves/Arenaria interpres           |      | Insecta/Polyommatus icarus          | Reptilia/Arizona elegans            |
| Insecta/Lophocampa caryae         |      | Aves/Parabuteo unicinctus           | Arachnida/Argiope aurantia          |
| Aves/Thalasseus sandvicensis      |      | Animalia/Limulus polyphemus         | Amphibia/Lithobates pipiens         |
| Aves/Geococcyx californianus      |      | Aves/Turdus philomelos              | Insecta/Labidomera clivicollis      |
| Insecta/Adelpha californica       |      | Aves/Dryocopus lineatus             | Insecta/Oncopeltus fasciatus        |
| Aves/Buteo lagopus                |      | Arachnida/Dysdera crocata           | Aves/Thalasseus maximus             |
| Insecta/Papilio polyxenes         |      | Insecta/Xanthocnemis zealandica     | Insecta/Diabrotica undecimpunctata  |
| Aves/Pooecetes gramineus          |      | Aves/Anas superciliosa platyrhyn-   | Aves/Corvus corone                  |
| Aves/Setophaga nigrescens         |      | chos                                | Amphibia/Taricha granulosa          |
| Aves/Pipilo maculatus             |      | Aves/Dryocopus pileatus             | Aves/Melospiza lincolni             |
| Aves/Pluvialis fulva              |      | Insecta/Enallagma basidens          | Insecta/Noctua pronuba              |
| Insecta/Libellula croceipennis    |      | Aves/Charadrius semipalmatus        | Amphibia/Lithobates sphenoccephalus |
| Arachnida/Leucauge venusta        |      | Aves/Accipiter striatus             | Reptilia/Sonora semiannulata        |
| Insecta/Urola nivalis             |      | Mammalia/Alces americanus           | Insecta/Libellula comanche          |
| Amphibia/Rhinella marina          |      | Insecta/Hypercompe scribonia        | Insecta/Calycopsis cecrops          |
| Reptilia/Coleonyx brevis          |      | Insecta/Anthanassa texana           | Mammalia/Capreolus capreolus        |
| Arachnida/Paraphidippus aurantius |      | Amphibia/Pseudacris regilla         | Insecta/Chrysochus auratus          |
| Aves/Molothrus aeneus             |      | Insecta/Mythimna unipuncta          | Insecta/Ctenucha virginica          |
| Aves/Regulus satrapa              |      | Aves/Podilymbus podiceps            | Aves/Oenanthe oenanthe              |
| Aves/Egretta tricolor             |      | Reptilia/Gopherus polyphemus        | Insecta/Lethe anthedon              |
| Insecta/Udea rubigalis            |      | Insecta/Brachymesia gravaida        | Amphibia/Scaphiopus couchii         |
| Insecta/Nymphalis antiopa         |      | Mammalia/Zalophus californianus     | Aves/Caracara cheriway              |
| Insecta/Homalodisca vitripennis   |      | Aves/Buteo plagiatus                | Aves/Quiscalus quiscula             |
| Aves/Columbina talpacoti          |      | Aves/Pheucticus melanocephalus      | Aves/Picoides nuttallii             |
| Aves/Chondestes grammacus         |      | Aves/Actitis macularius             | Aves/Setophaga virens               |
| Insecta/Vanessa itea              |      | Aves/Spizella pusilla               | Mammalia/Odocoileus hemionus        |
| Insecta/Papilio zelicaon          |      | Insecta/Euphydryas chalcedona       | Insecta/Poanes zabulon              |
| Mollusca/Mytilus californianus    |      | Aves/Troglodytes aedon              | Insecta/Sphech ichneumoneus         |
| Aves/Vireo huttoni                |      | Mammalia/Didelphis virginiana       | Mammalia/Tamiasciurus douglasii     |
| Aves/Hydroprogne caspia           |      | Insecta/Sympetrum semicinctum       | Aves/Lanius ludovicianus            |
| Aves/Vireo solitarius             |      | Aves/Nucifraga columbiana           | Insecta/Sympetrum obtrusum          |
| Insecta/Ischnura denticollis      |      | Arachnida/Argiope argentata         | Aves/Selasphorus platycercus        |
| Aves/Haemorrhous purpureus        |      | Aves/Tringa incana                  | Aves/Actitis hypoleucos             |
| Insecta/Aglais urticae            |      | Aves/Icterus spurius                | Arachnida/Latrodectus hesperus      |
| Amphibia/Notophthalmus viri-      | vir- | Aves/Tyrannus verticalis            | Animalia/Pisaster ochraceus         |
| descens                           |      | Aves/Tringa solitaria               | Aves/Gallinula galeata              |
| Aves/Zenaida asiatica             |      | Aves/Aquila chrysaetos              | Aves/Cyanocitta stelleri            |
| Reptilia/Pantherophis emoryi      |      | Reptilia/Virginia striatula         | Insecta/Lestes australis            |
| Insecta/Nathalis iole             |      | Mollusca/Doriopsilla albopunctata   | Mammalia/Lepus europaeus            |
| Aves/Toxostoma curvirostre        |      | Insecta/Dromogomphus spoliatus      | Reptilia/Sceloporus variabilis      |
| Animalia/Velella velella          |      | Insecta/Rhionaeschna multicolor     | Reptilia/Natrix natrix              |
| Insecta/Melissodes bimaculata     |      | Aves/Volatina jacarina              | Insecta/Argia sedula                |
| Mammalia/Phoca vitulina           |      | Amphibia/Incilius nebulifer         | Insecta/Coleomegilla maculata       |
| Mollusca/Antaeolidiella oliviae   |      | Aves/Melanerpes uropygialis         | Aves/Tringa flavipes                |
| Aves/Contopus virens              |      | Aves/Tyrannus vociferans            | Aves/Charadrius melodus             |
| Reptilia/Phrynosoma cornutum      |      | Insecta/Megisto cymela              | Insecta/Limenitis archippus         |
| Mammalia/Marmota monax            |      | Aves/Limnodromus griseus            | Mollusca/Cryptochiton stelleri      |
| Reptilia/Heloderma suspectum      |      | Insecta/Zelus renardii              | Aves/Buteo platypterus              |
| Insecta/Phoebis agarithe          |      | Aves/Fringilla coelebs              | Insecta/Dolichovespula maculata     |

|                                         |                                        |                                      |
|-----------------------------------------|----------------------------------------|--------------------------------------|
| Aves/Plegadis chihi                     | Insecta/Largus californicus            | Aves/Perisoreus canadensis           |
| Aves/Bonasa umbellus                    | Insecta/Urbanus proteus                | Aves/Mniotilta varia                 |
| Aves/Tringa semipalmata                 | Reptilia/Aspidoscelis sexlineata       | Aves/Leucophaeus pipixcan            |
| Aves/Spiza americana                    | Aves/Calidris mauri                    | Aves/Pyrocephalus rubinus            |
| Aves/Periparus ater                     | Aves/Aythya americana                  | Insecta/Cotinis nitida               |
| Aves/Egretta caerulea                   | Amphibia/Ambystoma maculatum           | Aves/Recurvirostra americana         |
| Aves/Oxyura jamaicensis                 | Aves/Contopus cooperi                  | Aves/Selasphorus rufus               |
| Insecta/Hippodamia convergens           | Aves/Certhia americana                 | Insecta/Euchaetes egle               |
| Insecta/Atteva aurea                    | Aves/Mycteria americana                | Aves/Ardenna creatopus               |
| Aves/Cygnus olor                        | Amphibia/Anaxyrus boreas               | Aves/Tachycineta bicolor             |
| Insecta/Dromogomphus spinosus           | halophilus                             | Insecta/Eumorphia pandorus           |
| Reptilia/Chrysemys picta                | Insecta/Phyciodes mylitta              | Arachnida/Peucetia viridans          |
| Aves/Ciconia ciconia                    | Insecta/Euphydryas phaeton             | Aves/Setophaga coronata auduboni     |
| Insecta/Urbanus procne                  | Insecta/Caenurgina erechtea            | Aves/Passerina ciris                 |
| Mollusca/Rumina decollata               | Insecta/Echinargus isola               | Aves/Poecile atricapillus            |
| Reptilia/Sphenodon punctatus            | Aves/Hylocichla mustelina              | Mammalia/Phocarctos hookeri          |
| Insecta/Lymantria dispar                | Arachnida/Latrodectus mactans          | Aves/Cygnus atratus                  |
| Aves/Columbina inca                     | Insecta/Epiaeschna heros               | Reptilia/Tarentola mauritanica       |
| Aves/Rhipidura leucophrys               | Aves/Passerina caerulea                | Aves/Catharus ustulatus              |
| Mollusca/Okenia rosacea                 | Insecta/Argia fumipennis               | Animalia/Cancer productus            |
| Animalia/Callinectes sapidus            | Animalia/Pugettia producta             | Aves/Pitangus sulphuratus            |
| Aves/Gallinula chloropus                | Mammalia/Mirounga angustirostris       | Insecta/Argia plana                  |
| Insecta/Celithemis elisa                | Amphibia/Hyla chrysoscelis             | Insecta/Ischnura hastata             |
| Reptilia/Scincella lateralis            | Insecta/Ochlodes sylvanoides           | Insecta/Plebejus acmon               |
| Insecta/Pieris napi                     | Reptilia/Pituophis catenifer catenifer | Aves/Glaucidium brasilianum          |
| Aves/Bucephala islandica                | Insecta/Hypena scabra                  | Mammalia/Pecari tajacu               |
| Aves/Falco tinnunculus                  | Amphibia/Bufo bufo                     | Reptilia/Chelydra serpentina         |
| Amphibia/Anaxyrus boreas                | Aves/Pipilo chlorurus                  | Aves/Sula nebouxii                   |
| Insecta/Bagrada hilaris                 | Insecta/Cicindela repanda              | Aves/Pelecanus occidentalis          |
| Amphibia/Plethodon cinereus             | Aves/Columba livia domestica           | Aves/Turdus grayi                    |
| Aves/Prothemadera novaeseelandiae       | Insecta/Aglais io                      | Mollusca/Tegula funebris             |
| Insecta/Sympetrum illotum               | Reptilia/Plestiodon skiltonianus       | Aves/Cynanthus latirostris           |
| Reptilia/Terrapene carolina triunguis   | Insecta/Anaea andria                   | Insecta/Thymelicus lineola           |
| Aves/Jacana spinosa                     | Mammalia/Megaptera novaeangliae        | Aves/Sporophila torqueola            |
| Insecta/Coenonympha tullia californiana | Reptilia/Anguis fragilis               | Aves/Tyrannus forficatus             |
| Mammalia/Neovison vison                 | Aves/Aythya marila                     | Insecta/Polygonia comma              |
| Mollusca/Triopha catalinae              | Insecta/Vanessa virginienensis         | Insecta/Melanoplus bivittatus        |
| Aves/Plegadis falcinellus               | Amphibia/Hyla versicolor               | Mollusca/Hermisenda crassicornis     |
| Aves/Anas strepera                      | Mammalia/Oreamnos americanus           | Aves/Branta bernicla                 |
| Aves/Bubulcus ibis                      | Reptilia/Crotalus viridis              | Aves/Thraupis episcopus              |
| Mammalia/Enhydra lutris nereis          | Insecta/Enallagma exsulans             | Insecta/Mestra amymone               |
| Insecta/Ascia monuste                   | Insecta/Sympetrum corruptum            | Insecta/Telebasis salva              |
| Aves/Haematopus palliatus               | Mollusca/Diaulula sandiegensis         | Aves/Calidris minutilla              |
| Aves/Calidris virgata                   | Insecta/Macroglossum stellatarum       | Insecta/Vespa crabro                 |
| Insecta/Pelidnota punctata              | Aves/Piranga rubra                     | Amphibia/Dicamptodon ensatus         |
| Aves/Nestor meridionalis                | Reptilia/Alligator mississippiensis    | Insecta/Ladona julia                 |
| Amphibia/Smilisca baudinii              | Aves/Dumetella carolinensis            | Mollusca/Cepaea nemoralis            |
| Aves/Mergus merganser                   | Amphibia/Anaxyrus speciosus            | Insecta/Atlides halesus              |
| Aves/Bubo scandiacus                    | Amphibia/Pelophylax                    | Aves/Setophaga petechia              |
| Reptilia/Tantilla gracilis              | Insecta/Coenonympha tullia             | Mammalia/Erinaceus europaeus         |
| Aves/Euphagus cyanocephalus             | Insecta/Erynnis horatius               | Reptilia/Coluber lateralis lateralis |
| Insecta/Papilio troilus                 | Aves/Setophaga caerulescens            | Animalia/Dermasterias imbricata      |
|                                         | Amphibia/Pseudacris sierra             | Insecta/Libytheana carinenta         |

Insecta/Pantala hymenaea  
 Aves/Icterus bullockii  
 Aves/Falco columbarius  
 Aves/Aythya valisineria  
 Aves/Calidris pusilla  
 Insecta/Vanessa annabella  
 Mollusca/Tonicella lineata  
 Aves/Crotophaga sulcirostris  
 Reptilia/Sceloporus undulatus  
 Aves/Anas crecca  
 Aves/Rostrhamus sociabilis  
 Aves/Chloris chloris  
 Insecta/Abaeis nicippe  
 Aves/Anser anser  
 Aves/Larus dominicanus dominicanus  
 Insecta/Spodoptera ornithogalli  
 Reptilia/Podarcis sicula  
 Insecta/Haploa clymene  
 Insecta/Jadera haematoloma  
 Aves/Sturnella magna  
 Aves/Milvus migrans  
 Aves/Alcedo atthis  
 Insecta/Hyles lineata  
 Aves/Zonotrichia albicollis  
 Reptilia/Crotalus scutulatus  
 Aves/Ptiliogonys cinereus  
 Mammalia/Felis catus  
 Insecta/Ancyloxypha numitor  
 Arachnida/Gasteracantha cancriformis  
 Insecta/Papilio canadensis  
 Insecta/Xylophanes tersa  
 Aves/Petrochelidon pyrrhonota  
 Insecta/Bombus griseocollis  
 Aves/Anser albifrons  
 Aves/Gavia immer  
 Insecta/Limenitis arthemis astyanax  
 Mollusca/Limacia cockerelli  
 Mammalia/Arctocephalus forsteri  
 Insecta/Panoquina ocola  
 Mammalia/Ondatra zibethicus  
 Insecta/Brephidium exilis  
 Mammalia/Otospermophilus beecheyi  
 Insecta/Libellula luctuosa  
 Insecta/Enallagma signatum  
 Insecta/Popillia japonica  
 Insecta/Alaus oculatus  
 Insecta/Dione moneta  
 Reptilia/Trachemys scripta  
 Aves/Geothlypis trichas  
 Aves/Aechmophorus occidentalis  
 Aves/Acridotheres tristis  
 Aves/Porphyrion martinicus  
 Animalia/Epiactis prolifera  
 Aves/Leucophaeus atricilla  
 Aves/Streptopelia chinensis  
 Aves/Anas discors  
 Mammalia/Ochotona princeps  
 Aves/Mergus serrator  
 Insecta/Enallagma civile  
 Aves/Upupa epops  
 Mammalia/Panthera leo  
 Aves/Fulmarus glacialis  
 Arachnida/Neoscona crucifera  
 Insecta/Coccinella septempunctata  
 Mammalia/Otospermophilus variegatus  
 Reptilia/Coluber flagellum testaceus  
 Amphibia/Notophthalmus viridescens viridescens  
 Aves/Psilorhinus morio  
 Insecta/Libellula vibrans  
 Aves/Passer montanus  
 Aves/Bubo virginianus  
 Aves/Dolichonyx oryzivorus  
 Aves/Passerella iliaca  
 Aves/Icterus abeillei  
 Aves/Strix varia  
 Aves/Patagioenas flavirostris  
 Aves/Setophaga citrina  
 Aves/Emberiza citrinella  
 Reptilia/Thamnophis sirtalis sirtalis  
 Aves/Sialia mexicana  
 Animalia/Procamburus clarkii  
 Reptilia/Hemidactylus turcicus  
 Aves/Larus californicus  
 Aves/Cairina moschata domestica  
 Aves/Tityra semifasciata  
 Reptilia/Crotaphytus collaris  
 Insecta/Argynnis paphia  
 Aves/Catharus fuscescens  
 Reptilia/Aspidoscelis exsanguis  
 Reptilia/Sternotherus odoratus  
 Aves/Larus argentatus  
 Reptilia/Eretmochelys imbricata  
 Aves/Sternula antillarum  
 Aves/Salpinctes obsoletus  
 Aves/Sturnella neglecta  
 Insecta/Phyciodes pulchella  
 Insecta/Bombus vosnesenskii  
 Insecta/Calopteryx maculata  
 Insecta/Pyrrharctia isabella  
 Mammalia/Eschrichtius robustus  
 Mammalia/Loxodonta africana  
 Aves/Arenaria melanocephala  
 Amphibia/Ensatina eschscholtzii xanthoptica  
 Arachnida/Misumena vatia  
 Insecta/Bombus terrestris  
 Aves/Piranga olivacea  
 Reptilia/Pantherophis alleghaniensis  
 Aves/Phalaropus tricolor  
 Insecta/Campaea perlata  
 Insecta/Prochoerodes lineola  
 Aves/Myiarchus cinerascens  
 Aves/Baeolophus atricristatus  
 Animalia/Anthopleura xanthogrammica  
 Aves/Chen rossii  
 Aves/Antigone canadensis  
 Aves/Parus major  
 Amphibia/Rana temporaria  
 Mammalia/Equus quagga  
 Insecta/Hetaerina americana  
 Mollusca/Deroceras reticulatum  
 Insecta/Chlosyne lacinia  
 Insecta/Phyciodes tharos  
 Reptilia/Nerodia rhombifer  
 Mammalia/Urocyon cinereoargenteus  
 Reptilia/Phrynosoma modestum  
 Aves/Buteo swainsoni  
 Insecta/Tetraopes tetrophthalmus  
 Aves/Phoenicurus ochruros  
 Reptilia/Crotalus oreganus  
 Insecta/Pontia protodice  
 Insecta/Eurytides marcellus  
 Insecta/Ischnura posita  
 Insecta/Pseudoleon superbus  
 Aves/Erithacus rubecula  
 Animalia/Emerita analoga  
 Insecta/Tenodera sinensis  
 Insecta/Bombylius major  
 Aves/Cepphus columba  
 Insecta/Estigmene acraea  
 Reptilia/Pseudemys texana  
 Aves/Setophaga dominica  
 Insecta/Argia nahuana  
 Reptilia/Podarcis muralis  
 Aves/Turdus merula  
 Aves/Alauda arvensis  
 Reptilia/Apalone spinifera  
 Reptilia/Sceloporus uniformis  
 Aves/Thryomanes bewickii  
 Aves/Corvus cornix  
 Arachnida/Argiope trifasciata  
 Aves/Haemorhous cassinii  
 Insecta/Pieris marginalis

Animalia/Harpaghe haydeniana  
 Aves/Anthus rubescens  
 Insecta/Argia tibialis  
 Reptilia/Sceloporus occidentalis bo-  
 courtii  
 Amphibia/Anaxyrus americanus  
 Reptilia/Sceloporus olivaceus  
 Insecta/Manduca sexta  
 Aves/Psaltriparus minimus  
 Aves/Callipepla squamata  
 Insecta/Galgula partita  
 Aves/Oreothlypis ruficapilla  
 Aves/Paroaria coronata  
 Aves/Dendrocygna autumnalis  
 Aves/Larus canus  
 Reptilia/Callisaurus draconoides  
 Animalia/Anthopleura elegantissima  
 Aves/Colinus virginianus  
 Insecta/Limenitis arthemis arthemis  
 Mammalia/Callospermophilus later-  
 alis  
 Insecta/Cicindela sexguttata  
 Aves/Pachyrampus aglaiae  
 Insecta/Xylocopa micans  
 Insecta/Ischnura verticalis  
 Reptilia/Crotalus ruber  
 Aves/Anas clypeata  
 Aves/Nyctanassa violacea  
 Aves/Cardellina pusilla  
 Insecta/Dythemis nigrescens  
 Aves/Hemiphaga novaeseelandiae  
 Aves/Passerculus sandwichensis  
 Insecta/Battus philenor hirsuta  
 Aves/Egretta garzetta  
 Aves/Chaetura pelagica  
 Insecta/Polygonia satyrus  
 Insecta/Dythemis velox  
 Aves/Setophaga ruticilla  
 Aves/Setophaga magnolia  
 Insecta/Poanes melane  
 Aves/Buteogallus anthracinus  
 Aves/Sterna hirundo  
 Animalia/Tetraclita rubescens  
 Insecta/Argia lugens  
 Reptilia/Elgaria multicarinata webbii  
 Reptilia/Sceloporus graciosus  
 Aves/Saxicola rubetra  
 Insecta/Trimerotropis pallidipennis  
 Reptilia/Coluber flagellum  
 Aves/Setophaga palmarum  
 Amphibia/Taricha torosa  
 Insecta/Melanoplus differentialis  
 Mollusca/Ambigolimax valentianus  
 Aves/Calidris bairdii  
 Insecta/Poanes hobomok  
 Insecta/Polistes metricus  
 Amphibia/Gastrophryne olivacea  
 Aves/Setophaga americana  
 Aves/Icterus pustulatus  
 Aves/Coccothraustes vespertinus  
 Insecta/Microcrambus elegans  
 Aves/Sphyrapicus ruber  
 Aves/Megaceryle alcyon  
 Aves/Phalacrocorax pelagicus  
 Insecta/Leptoglossus occidentalis  
 Aves/Bucephala albeola  
 Aves/Dendrocopos major  
 Mammalia/Eidolon helvum  
 Mammalia/Ovis canadensis  
 Insecta/Erythrodiplax umbrata  
 Insecta/Bombus pennsylvanicus  
 Aves/Pavo cristatus  
 Aves/Tachybaptus dominicus  
 Insecta/Celastrina echo  
 Amphibia/Ensatina eschscholtzii  
 Aves/Myiarchus crinitus  
 Aves/Gavia pacifica  
 Insecta/Argia vivida  
 Aves/Ixoreus naevius  
 Aves/Pluvialis squatarola  
 Amphibia/Rana draytonii  
 Actinopterygii/Gambusia affinis  
 Aves/Setophaga townsendi  
 Mollusca/Doris montereyensis  
 Aves/Motacilla alba  
 Aves/Quiscalus major  
 Aves/Eudocimus albus  
 Insecta/Lerodea eufala  
 Insecta/Schistocerca nitens  
 Aves/Chroicocephalus scopulinus  
 Insecta/Hemiargus ceraunus  
 Aves/Spizella pallida  
 Reptilia/Chelonia mydas  
 Insecta/Halyomorpha halys  
 Insecta/Perithemis tenera  
 Aves/Megaceryle torquata  
 Insecta/Polygonia c-album  
 Reptilia/Crocodylus acutus  
 Aves/Uria aalge  
 Aves/Columbina passerina  
 Aves/Cygnus buccinator  
 Aves/Megascops asio  
 Aves/Sula leucogaster  
 Aves/Circus cyaneus  
 Insecta/Limenitis lorquini  
 Aves/Gymnorhina tibicen  
 Insecta/Polistes dominula  
 Aves/Sayornis phoebe  
 Aves/Phalacrocorax carbo  
 Actinopterygii/Oncorhynchus mykiss  
 Insecta/Ischnura ramburii  
 Aves/Callipepla gambelii  
 Insecta/Melanchroia chephise  
 Insecta/Erynnis baptisiae  
 Aves/Psittacula krameri  
 Aves/Piranga ludoviciana  
 Aves/Lophodytes cucullatus  
 Aves/Setophaga pinus  
 Reptilia/Hypsiglena jani  
 Insecta/Graphocephala coccinea  
 Amphibia/Hyla arenicolor  
 Insecta/Zerene cesonia  
 Insecta/Lerema accius  
 Aves/Melanerpes erythrocephalus  
 Insecta/Prosapia bicincta  
 Insecta/Libellula needhami  
 Aves/Anas rubripes  
 Insecta/Vanessa gonerilla gonerilla  
 Mollusca/Triopha maculata  
 Insecta/Libellula semifasciata  
 Aves/Zonotrichia querula  
 Mollusca/Phidiana hiltoni  
 Mammalia/Trichosurus vulpecula  
 Reptilia/Thamnophis marcianus  
 Insecta/Leptotes marina  
 Amphibia/Aneides lugubris  
 Aves/Anas penelope  
 Amphibia/Lithobates clamitans  
 Insecta/Colias eurytheme  
 Aves/Haematopus unicolor  
 Aves/Zonotrichia capensis  
 Aves/Parkesia motacilla  
 Reptilia/Nerodia erythrogaster  
 Aves/Mimus gilvus  
 Mollusca/Calliostoma ligatum  
 Aves/Empidonax difficilis  
 Aves/Melospiza fusca  
 Aves/Aimophila ruficeps  
 Reptilia/Nerodia sipedon sipedon  
 Mammalia/Lepus californicus  
 Insecta/Lycaena phlaeas  
 Mammalia/Mephitis mephitis  
 Reptilia/Thamnophis sirtalis  
 Insecta/Uresiphita reversalis  
 Aves/Calidris alpina  
 Insecta/Pyrisitia lisa  
 Aves/Sitta pygmaea  
 Mammalia/Myocastor coypus  
 Aves/Gavia stellata

|                                               |                                              |                                      |
|-----------------------------------------------|----------------------------------------------|--------------------------------------|
| Aves/Aechmophorus clarkii                     | Aves/Prothemadera novaeseelandiae            | Aves/Oreothlypis celata              |
| Actinopterygii/Cyprinus carpio                | novaeseelandiae                              | Mammalia/Cynomys ludovicianus        |
| Reptilia/Sceloporus graciosus vandenburgianus | Reptilia/Pantherophis obsoletus              | Insecta/Halysidota tessellaris       |
| Insecta/Anthocharis sara                      | Insecta/Chlosyne palla                       | Insecta/Arilus cristatus             |
| Aves/Anhinga anhinga                          | Aves/Phalacrocorax brasilianus               | Insecta/Erynnis funeralis            |
| Insecta/Erythemis collocata                   | Aves/Himantopus himantopus                   | Insecta/Coenonympha pamphilus        |
| Amphibia/Pseudacris crucifer                  | Mammalia/Enhydra lutris                      | Aves/Eupsittula canicularis          |
| Reptilia/Terrapene carolina                   | Aves/Numenius americanus                     | Insecta/Vanessa cardui               |
| Mollusca/Geitodoris heathi                    | Aves/Melanitta perspicillata                 | Aves/Myiozetetes similis             |
| Mammalia/Sciurus aureogaster                  | Mammalia/Sus scrofa                          | Insecta/Libellula quadrimaculata     |
| Reptilia/Aspidoscelis tigris                  | Aves/Carduelis cannabina                     | Insecta/Acanthocephala terminalis    |
| Insecta/Idia aemula                           | Aves/Podiceps nigricollis                    | Aves/Anthornis melanura              |
| Aves/Icterus galbula                          | Aves/Cinclus mexicanus                       | Insecta/Papilio machaon              |
| Reptilia/Sceloporus occidentalis longipes     | Reptilia/Terrapene carolina carolina         | Aves/Rupornis magnirostris           |
| Aves/Larus marinus                            | Insecta/Phyciodes phaon                      | Mammalia/Dasyus novemcinctus         |
| Insecta/Libellula saturata                    | Aves/Anas americana                          | Aves/Buteo buteo                     |
| Reptilia/Anolis sagrei                        | Aves/Tachycineta thalassina                  | Aves/Troglodytes pacificus           |
| Reptilia/Pituophis catenifer                  | Insecta/Celastrina neglecta                  | Reptilia/Sceloporus consobrinus      |
| Aves/Xanthocephalus xanthocephalus            | Aves/Archilochus colubris                    | Reptilia/Nerodia fasciata confluens  |
| Aves/Sitta europaea                           | Aves/Chamaea fasciata                        | Insecta/Euptoieta claudia            |
| Insecta/Leptoglossus phyllopus                | Insecta/Sympetrum ambiguum                   | Aves/Chroicocephalus philadelphia    |
| Aves/Regulus calendula                        | Insecta/Eristalis tenax                      | Reptilia/Rena dulcis                 |
| Reptilia/Micrurus tener                       | Aves/Tyto alba                               | Aves/Fregata magnificens             |
| Actinopterygii/Ostracion meleagris            | Aves/Somateria mollissima                    | Aves/Setophaga pensylvanica          |
| Aves/Catherpes mexicanus                      | Aves/Setophaga coronata coronata             | Insecta/Hemaris diffinis             |
| Aves/Plectrophenax nivalis                    | Aves/Spizella passerina                      | Reptilia/Elgaria multicarinata       |
| Mollusca/Peltodoris nobilis                   | Reptilia/Agkistrodon piscivorus              | Aves/Patagioenas fasciata            |
| Reptilia/Urosaurus ornatus                    | Aves/Turdus rufopalliatus                    | Aves/Pheucticus ludovicianus         |
| Reptilia/Zootoca vivipara                     | Insecta/Erythrodiplax berenice               | Aves/Setophaga striata               |
| Aves/Fulica atra                              | Reptilia/Crotalus atrox                      | Aves/Larus fuscus                    |
| Amphibia/Osteopilus septentrionalis           | Reptilia/Elgaria multicarinata multicarinata | Insecta/Enallagma carunculatum       |
| Insecta/Haematopsis grataria                  | Aves/Falco peregrinus                        | Insecta/Alypia octomaculata          |
| Aves/Aphelocoma wollweberi                    | Aves/Melanerpes formicivorus                 | Reptilia/Plestiodon laticeps         |
| Mammalia/Vulpes vulpes                        | Insecta/Libellula incesta                    | Arachnida/Latrodectus geometricus    |
| Insecta/Olla v-nigrum                         | Insecta/Marpesia petreus                     | Actinopterygii/Micropterus salmoides |
| Aves/Anas platyrhynchos diazi                 | Aves/Milvus milvus                           | Aves/Asio otus                       |
| Aves/Icteria virens                           | Mollusca/Otala lactea                        |                                      |
| Insecta/Erythemis vesiculosa                  | Insecta/Heliconius charithonia               |                                      |
| Insecta/Siproeta stelenes                     | Reptilia/Storeria dekayi texana              |                                      |
| Aves/Sayornis saya                            | Amphibia/Acris blanchardi                    |                                      |
| Aves/Podiceps grisegena                       | Insecta/Antheraea polyphemus                 |                                      |
| Aves/Leptotila verreauxi                      | Mammalia/Taxidea taxus                       |                                      |
| Aves/Toxostoma rufum                          | Insecta/Cisseps fulvicollis                  |                                      |
| Aves/Podiceps cristatus                       | Aves/Seiurus aurocapilla                     |                                      |
| Aves/Aythya affinis                           | Reptilia/Gopherus berlandieri                |                                      |
| Aves/Melospiza georgiana                      | Mollusca/Aplysia californica                 |                                      |
| Reptilia/Uta stansburiana                     | Aves/Myiopsitta monachus                     |                                      |
| Insecta/Libellula pulchella                   | Mammalia/Sylvilagus bachmani                 |                                      |
| Insecta/Odontotaenius disjunctus              | Aves/Poecile gambeli                         |                                      |
| Aves/Coragyps atratus                         | Mammalia/Odocoileus hemionus columbianus     |                                      |
|                                               | Reptilia/Cophosaurus texanus                 |                                      |
